# Supplementary material
Source: HighWire-hosted journal article supplement (https://bmjopen.bmj.com/content/12/2/e053477)
Supplement: inline-supplementary-material-1 [file inline-supplementary-material-1.pdf]

## Supplementary Material.

**Supplementary Table 1.** Clinical characteristics and prevalence of baseline co-morbidities with and without electrocardiographic left ventricular hypertrophy matched by QRS duration in the general population.

|                          | No LVH,<br>QRS <100 ms<br>(n = 3 785) |        | LVH,<br>QRS <100 ms<br>(n = 934) |        | <i>P value</i> * | No LVH,<br>QRS 100-109 ms<br>(n = 750) |        | LVH,<br>QRS 100-109 ms<br>(n = 303) |        | <i>P value</i> * | No LVH,<br>QRS ≥110 ms<br>(n = 161) |        | LVH,<br>QRS ≥110 ms<br>(n = 100) |        | <i>P value</i> * |
|--------------------------|---------------------------------------|--------|----------------------------------|--------|------------------|----------------------------------------|--------|-------------------------------------|--------|------------------|-------------------------------------|--------|----------------------------------|--------|------------------|
|                          | N/(mean)                              | %/(SD) | N/(mean)                         | %/(SD) |                  | N/(mean)                               | %/(SD) | N/(mean)                            | %/(SD) |                  | N/(mean)                            | %/(SD) | N/(mean)                         | %/(SD) |                  |
| Male                     | 1 300                                 | 34.3   | 410                              | 43.9   | <0.001           | 569                                    | 75.9   | 207                                 | 68.3   | 0.012            | 144                                 | 89.4   | 83                               | 83.0   | 0.133            |
| Age (years)              | (51.1)                                | (14.0) | (57.9)                           | (15.5) | <0.001           | (48.9)                                 | (13.2) | (54.9)                              | (15.7) | <0.001           | (52.1)                              | (15.1) | (57.0)                           | (16.9) | 0.033            |
| BMI (kg/m <sup>2</sup> ) | (26.8)                                | (4.8)  | (26.9)                           | (4.5)  | 0.307            | (27.2)                                 | (4.4)  | (27.4)                              | (4.4)  | 0.292            | (28.0)                              | (4.2)  | (27.1)                           | (3.8)  | 0.105            |
| Current smoking          | 845                                   | 22.3   | 148                              | 15.8   | <0.001           | 196                                    | 26.1   | 64                                  | 21.1   | 0.088            | 47                                  | 29.2   | 17                               | 17.0   | 0.026            |
| LDL cholesterol (mmol/L) | (3.7)                                 | (1.0)  | (3.9)                            | (1.1)  | <0.001           | (3.7)                                  | (1.0)  | (3.7)                               | (1.0)  | 0.932            | (3.6)                               | (0.9)  | (3.8)                            | (0.9)  | 0.077            |
| QRS duration (ms)        | (86)                                  | (7)    | (87)                             | (7)    | <0.001           | (103)                                  | (3)    | (103)                               | (3)    | 0.627            | (116)                               | (5)    | (118)                            | (8)    | 0.008            |
| Hypertension             | 1 545                                 | 41.0   | 616                              | 66.1   | <0.001           | 331                                    | 44.3   | 194                                 | 64.0   | <0.001           | 86                                  | 53.4   | 71                               | 71.0   | 0.005            |
| Diabetes mellitus        | 190                                   | 5.0    | 67                               | 7.2    | 0.009            | 38                                     | 5.1    | 30                                  | 9.9    | 0.004            | 7                                   | 4.3    | 5                                | 5.0    | 0.772            |
| Coronary Heart Disease   | 270                                   | 7.1    | 141                              | 15.1   | <0.001           | 62                                     | 8.3    | 46                                  | 15.2   | <0.001           | 23                                  | 14.3   | 26                               | 26.0   | 0.018            |
| Myocardial infarction    | 81                                    | 2.1    | 49                               | 5.2    | <0.001           | 35                                     | 4.7    | 18                                  | 5.9    | 0.392            | 15                                  | 9.3    | 15                               | 15.0   | 0.162            |
| Heart Failure            | 51                                    | 1.3    | 41                               | 4.4    | <0.001           | 13                                     | 1.7    | 11                                  | 3.6    | 0.062            | 6                                   | 3.7    | 7                                | 7.0    | 0.254            |

\*p value for difference between matched QRS duration subgroups.

**Supplementary Table 2.** Adjusted Cox proportional hazard analysis for mortality and incident heart failure events in subjects without electrocardiographic left ventricular hypertrophy in three QRS duration subgroups.

|                                 | No. of deaths / incident HF (%) | Age- and gender-adjusted |           |         | Multivariable <sup>a</sup> -adjusted |           |         |
|---------------------------------|---------------------------------|--------------------------|-----------|---------|--------------------------------------|-----------|---------|
|                                 |                                 | Hazard Ratio             | 95% CI    | p-value | Hazard Ratio                         | 95% CI    | p-value |
| <b>Cardiovascular Mortality</b> |                                 |                          |           |         |                                      |           |         |
| QRS duration                    |                                 |                          |           |         |                                      |           |         |
| <100 ms                         | 219 (5.8%)                      | 1                        |           |         | 1                                    |           |         |
| 100–109 ms                      | 64 (8.5%)                       | 1.01                     | 0.76–1.33 | 0.970   | 0.93                                 | 0.70–1.24 | 0.622   |
| ≥110 ms                         | 27 (16.8%)                      | 1.49                     | 0.99–2.24 | 0.055   | 1.10                                 | 0.71–1.70 | 0.681   |
| <b>All-cause Mortality</b>      |                                 |                          |           |         |                                      |           |         |
| QRS duration                    |                                 |                          |           |         |                                      |           |         |
| <100 ms                         | 641 (16.9%)                     | 1                        |           |         | 1                                    |           |         |
| 100–109 ms                      | 120 (16.0%)                     | 0.86                     | 0.70–1.05 | 0.130   | 0.83                                 | 0.68–1.02 | 0.081   |
| ≥110 ms                         | 38 (23.6%)                      | 0.92                     | 0.71–1.39 | 0.964   | 0.82                                 | 0.58–1.17 | 0.282   |
| <b>New-onset Heart Failure</b>  |                                 |                          |           |         |                                      |           |         |
| QRS duration                    |                                 |                          |           |         |                                      |           |         |
| <100 ms                         | 176 (4.6%)                      | 1                        |           |         | 1                                    |           |         |
| 100–109 ms                      | 45 (6.0%)                       | 1.22                     | 0.77–1.92 | 0.397   | 1.23                                 | 0.78–1.94 | 0.380   |
| ≥110 ms                         | 13 (8.1%)                       | 0.37                     | 0.09–1.51 | 0.164   | 0.36                                 | 0.09–1.50 | 0.922   |

CI = confidence interval. <sup>a</sup>Adjusted for age, sex, coronary heart disease, myocardial infarction, heart failure, hypertension, ST-depression in lead V5, diabetes mellitus, smoking, body mass index and low-density lipoprotein cholesterol.
